# Supplementary material
Source: MDPI journal article supplement (https://www.mdpi.com/2076-3417/13/6/3864)
Supplement: s1 [file s1]

# **An evaluation of landmark-based methods to explore tooth score morphology: a case study on felids and hyenids.**

## **Supplementary File S1**

**Mari Carmen Arriaza <sup>1\*</sup>, Julia Aramendi <sup>2\*</sup>, Lloyd A. Courtenay <sup>3</sup>, Miguel Ángel Maté-González<sup>3</sup>, Darío Herranz-Rodrigo <sup>4,5</sup>, Diego González-Aguilera <sup>3</sup>, and José Yravedra <sup>1,4</sup>**

<sup>1</sup> Department of Prehistory, Ancient History and Archaeology, Universidad Complutense de Madrid, Madrid 28040, Spain

<sup>2</sup> Department of Geology, Facultad de Ciencia y Tecnología, Universidad del País Vasco-Euskal Herriko Unibertsitatea (UPV/EHU), Barrio Sarriena s/n, 48940 Leioa, Spain

<sup>3</sup> Department of Cartographic and Terrain Engineering, Higher Polytechnic School of Ávila, Universidad de Salamanca, Hornos Caleros 50, 05003 Ávila, Spain

<sup>4</sup> C.A.I. Archaeometry and Archaeological Analysis, Universidad Complutense de Madrid, Madrid 28040, Spain

<sup>5</sup> GIAP Team, Catalan Institute of Classical Archaeology, Plaça d'en Rovellat s/n, 43003 Tarragona, Spain

\*Correspondence: marria03@ucm.es; julia.aramendi@ehu.eus

### PHOTOGRAPHS

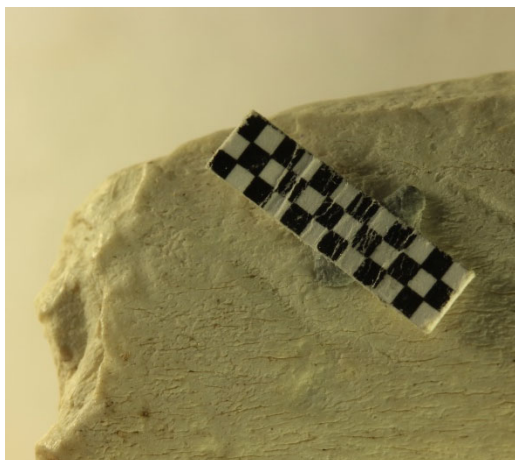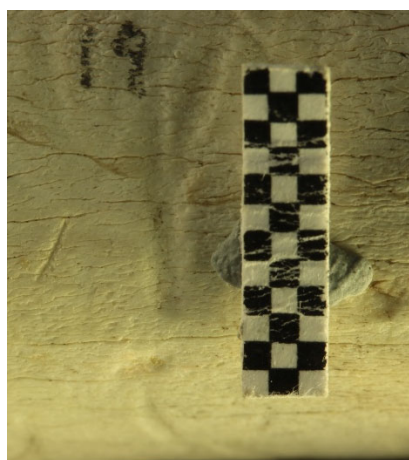

### 3D MODELS

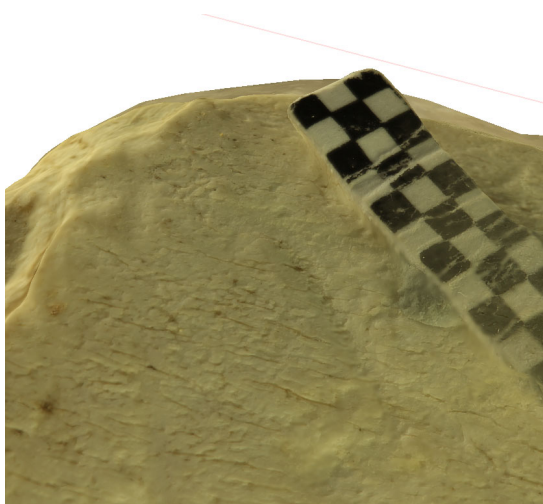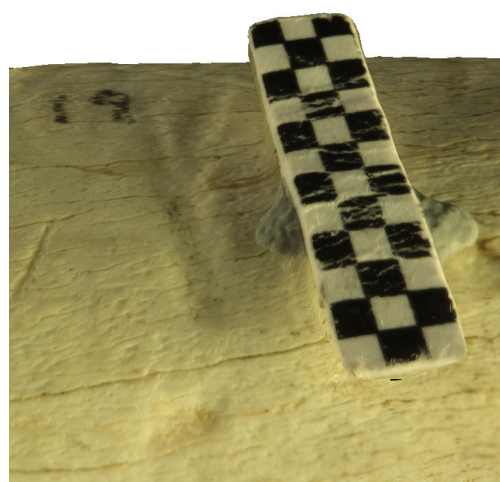

**Figure S1.** Tooth scores carried out by the lion used for the study. Photographs and 3D models are shown.

### PHOTOGRAPHS

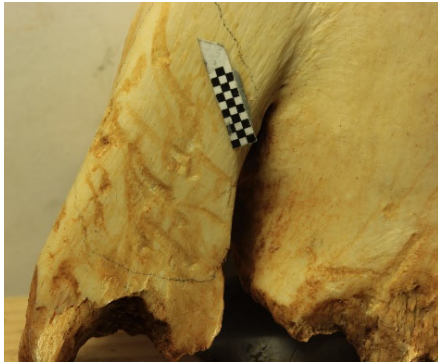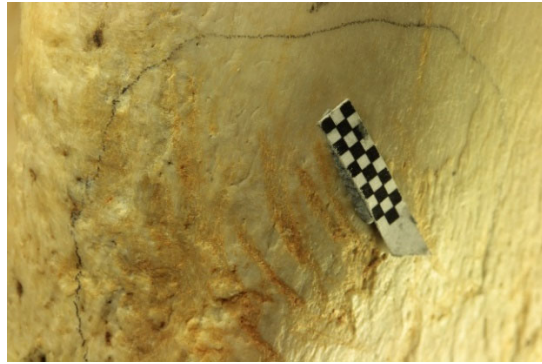

### 3D MODELS

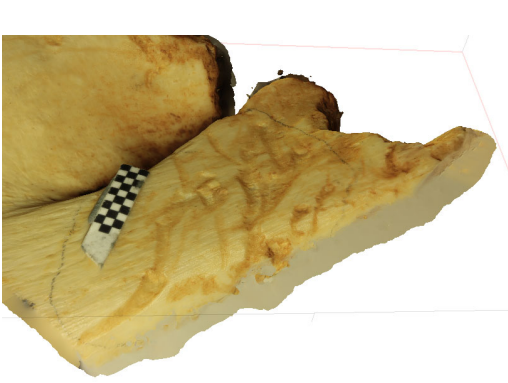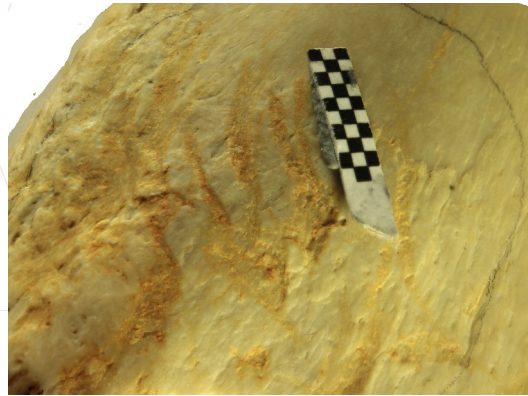

**Figure S2.** Tooth scores carried out by the spotted hyena used for the study. Photographs and 3D models are shown.

### PHOTOGRAPHS

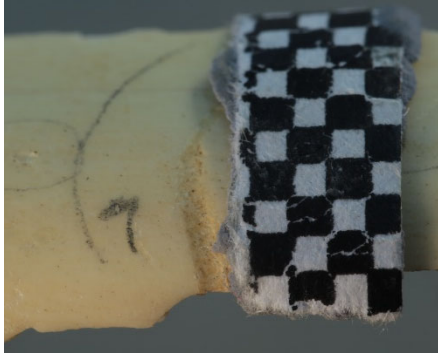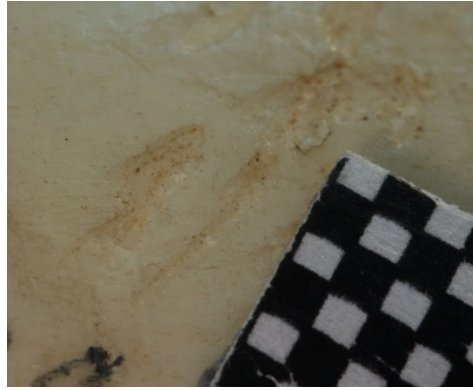

### 3D MODELS

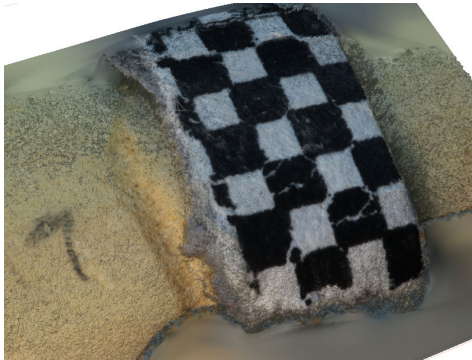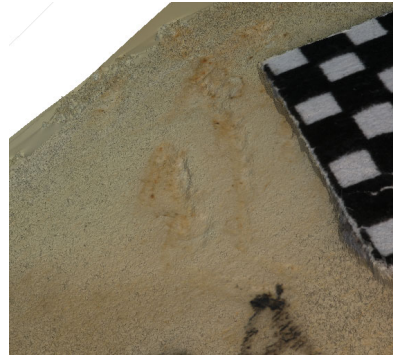

**Figure S3.** Tooth scores carried out by the brown hyena used for the study. Photographs and 3D models are shown.



### PHOTOGRAPHS

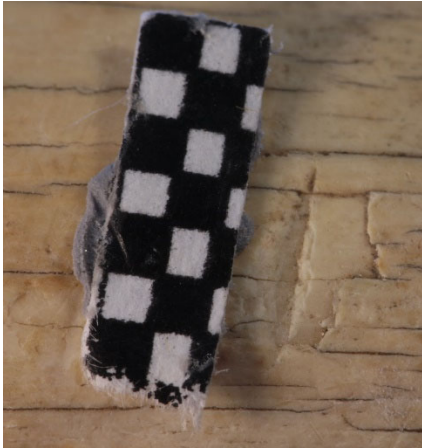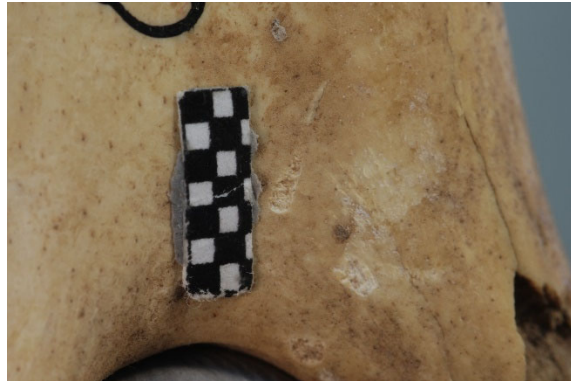

### 3D MODELS

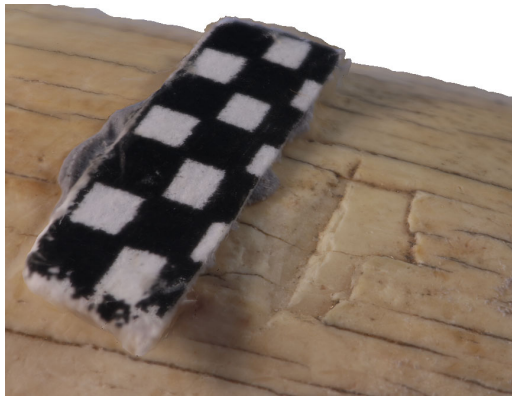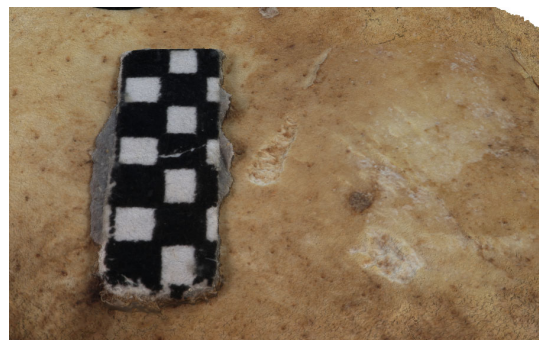

**Figure S4.** Tooth scores carried out by the leopard used for the study. Photographs and 3D models are shown.

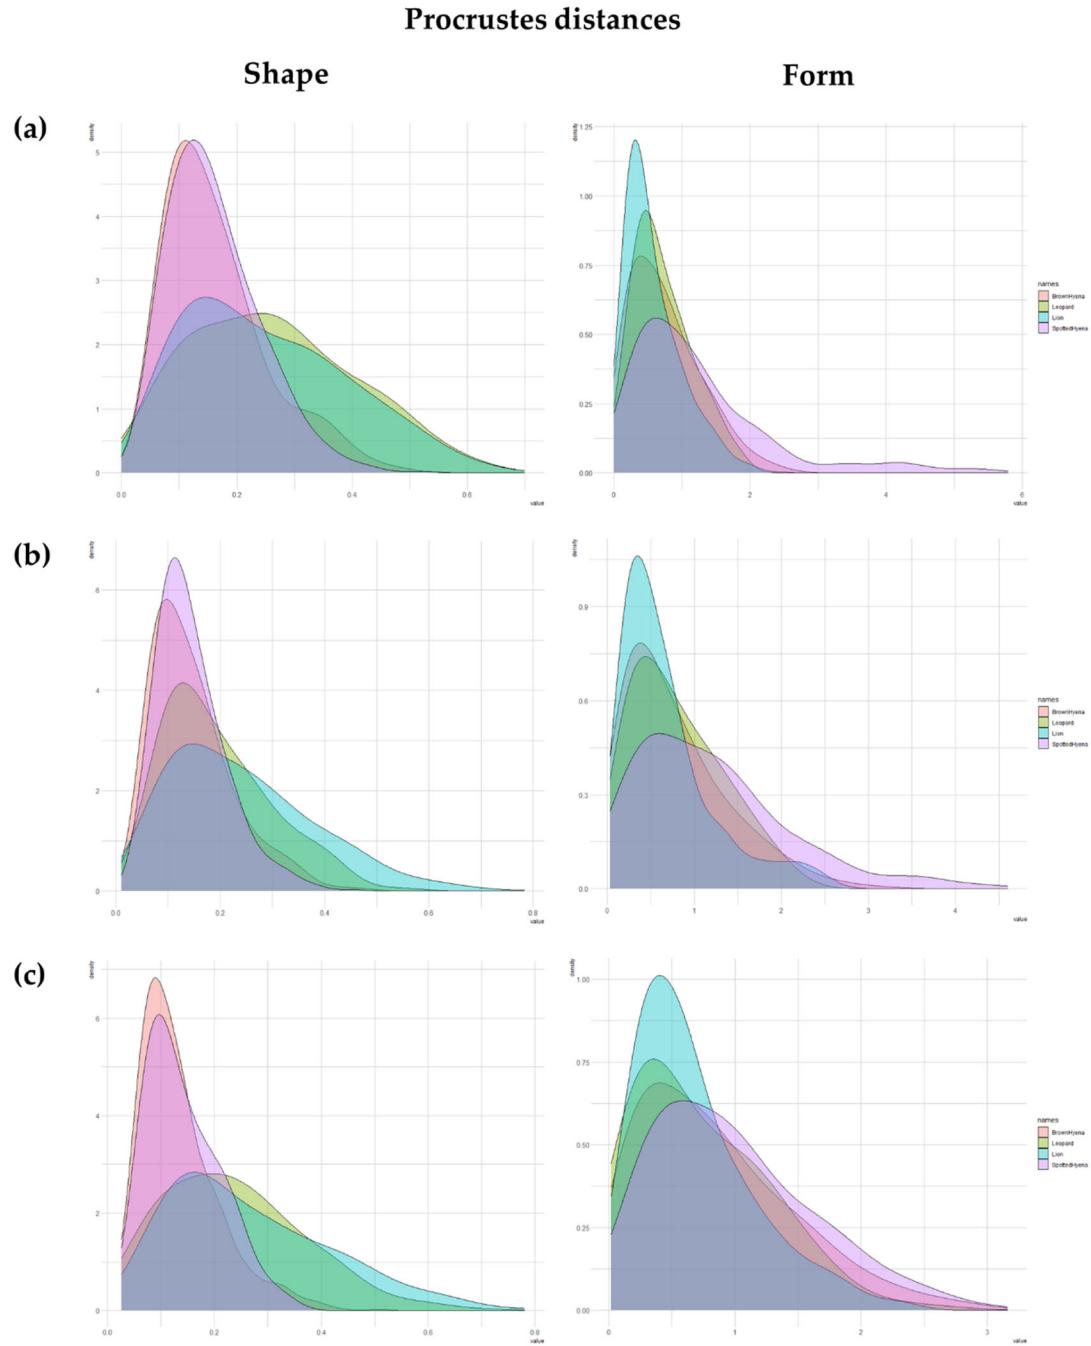

**Figure S5.** Procrustes distances calculated for the four carnivore groups in shape and form space using the 7-landmark model to characterize the score cross-section at (a) 35% score length; (b) 50% score length; and (c) 65% score length.

(a)

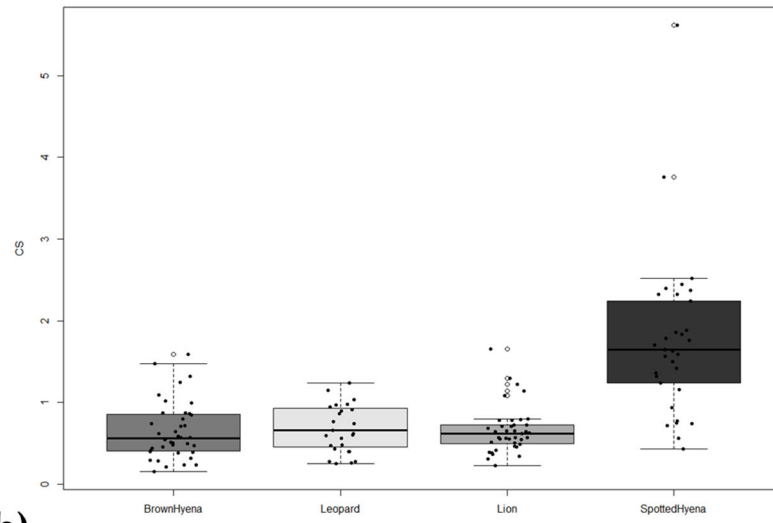

(b)

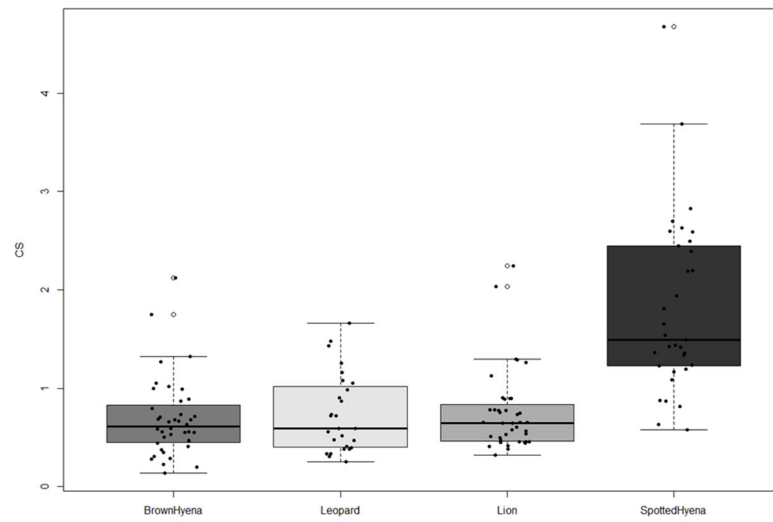

(c)

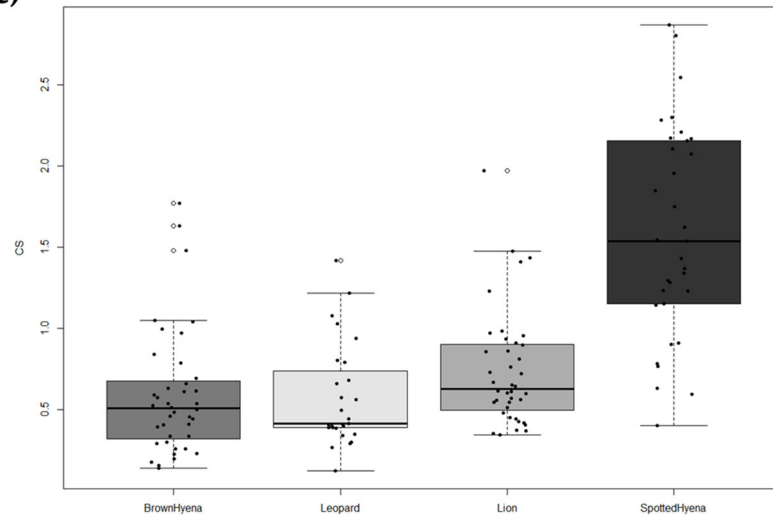

**Figure S6.** Centroid Size of the carnivore scores included in the present study based on the cross-sections taken at (a) 35% score length; (b) 50% score length; and (c) 65% score length.

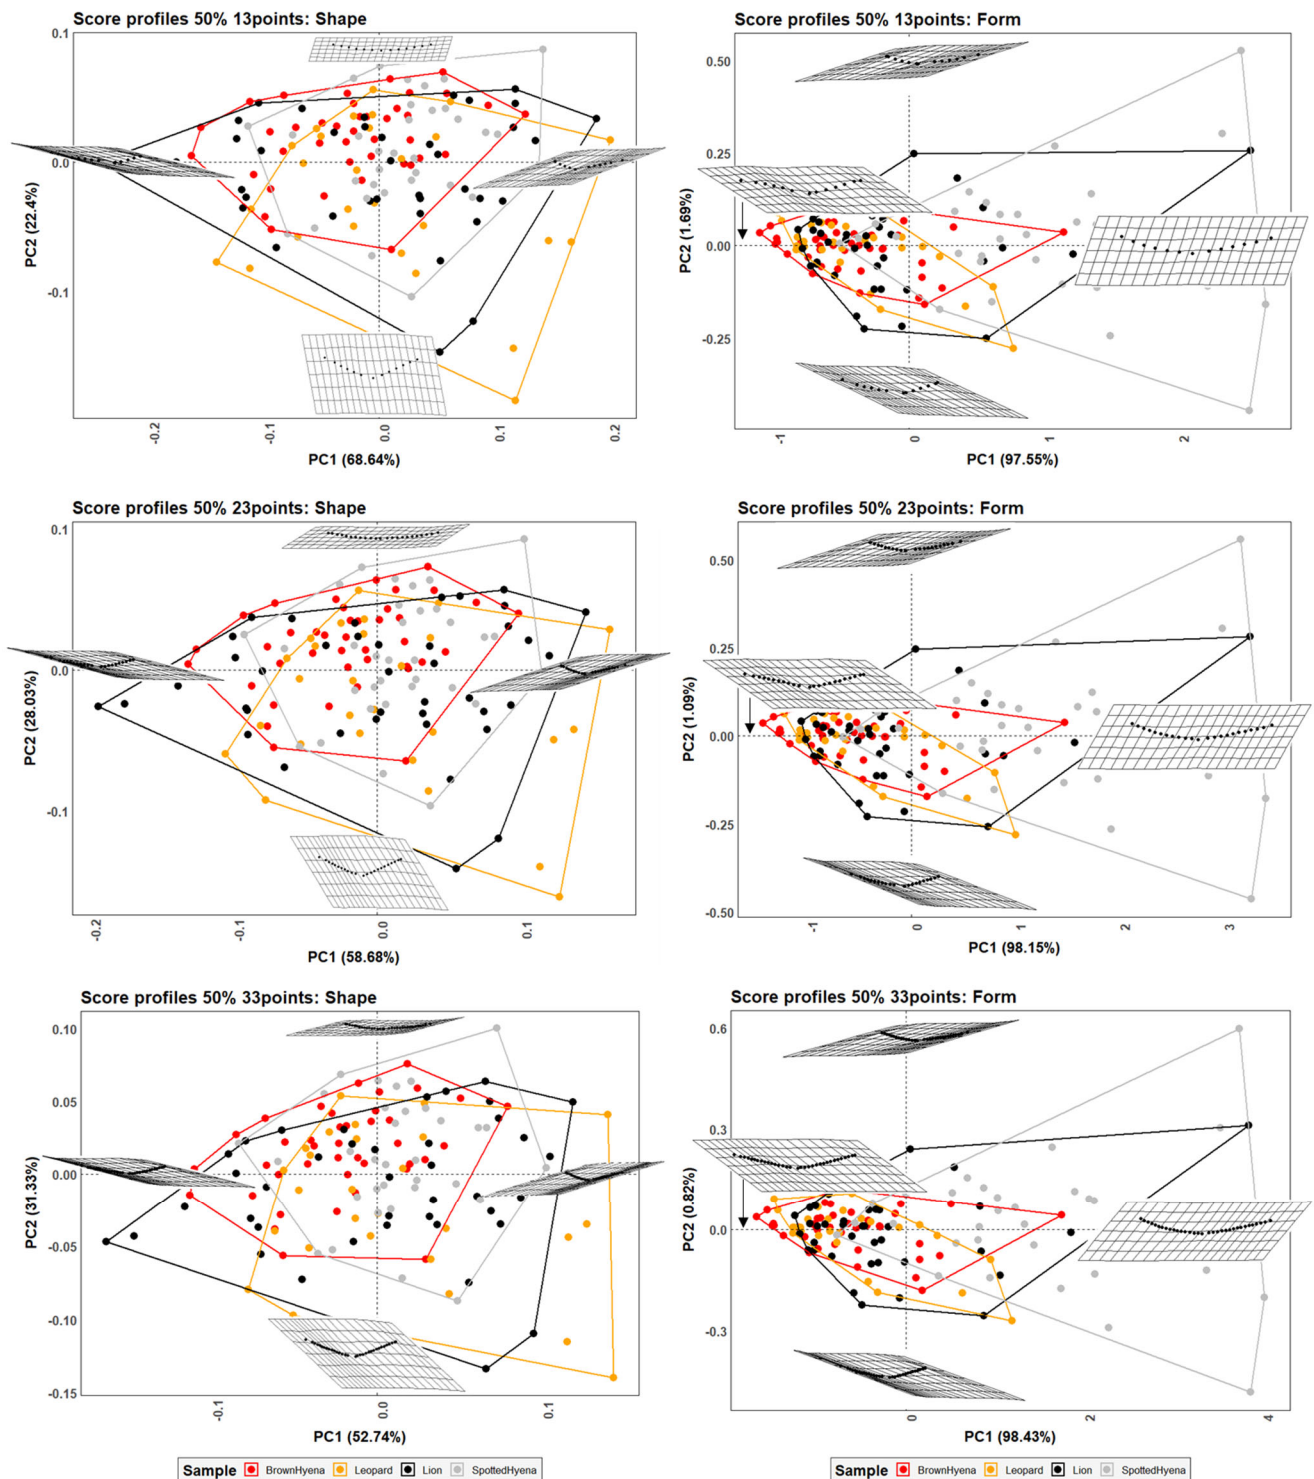

**Figure S7.** PCA plots in shape and form space on the 2-curves semilandmark models at 50% cross-sectional score length, using 13 points; 23 points; and 33 points. Extreme changes in shape and form along PC1 and PC2 are illustrated with the aid of transformation grids.



## Fourier Analysis at 50% score lenght; Shape space

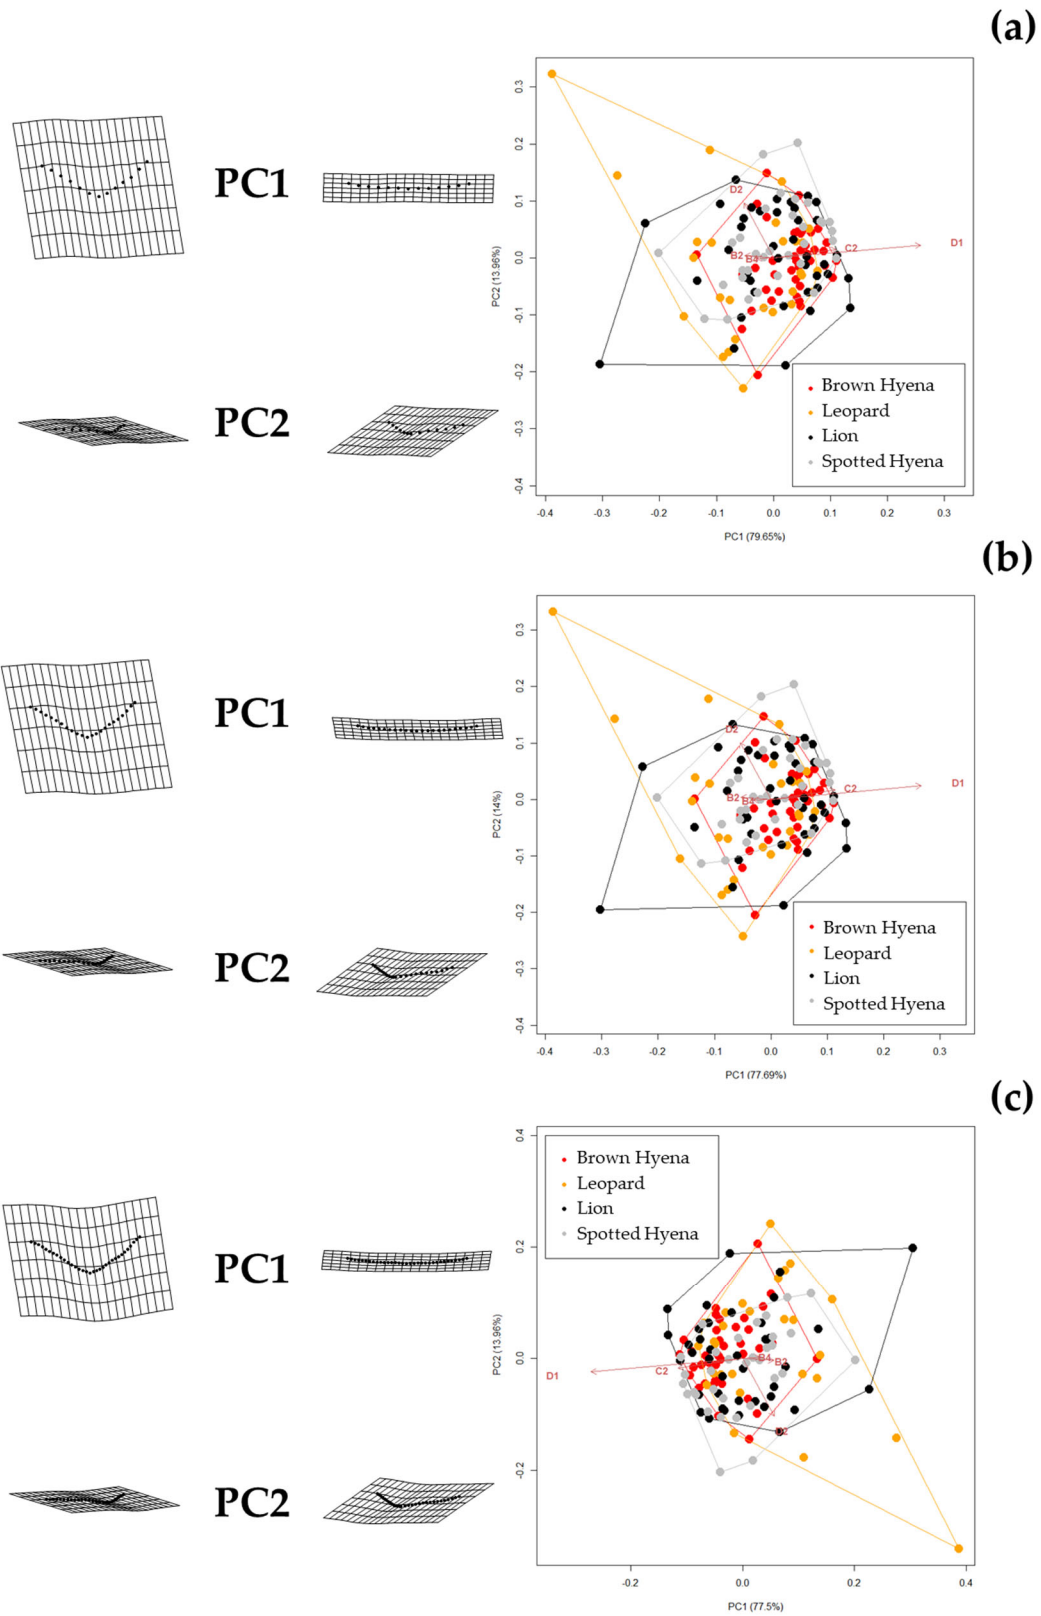

**Figure S8.** Shape PCA plots on Elliptic Fourier Analysis on the 2-curves semilandmark models at 50% cross-sectional score length, using (a) 13 points; (b) 23 points; and (c) 33 points. Extreme changes in shape along PC1 and PC2 are illustrated with the aid of transformation grids. Optimal harmonics for each model are (a) 4; (b) 6; (c) 6.

## Fourier Analysis at 50% score length; Form space

(a)

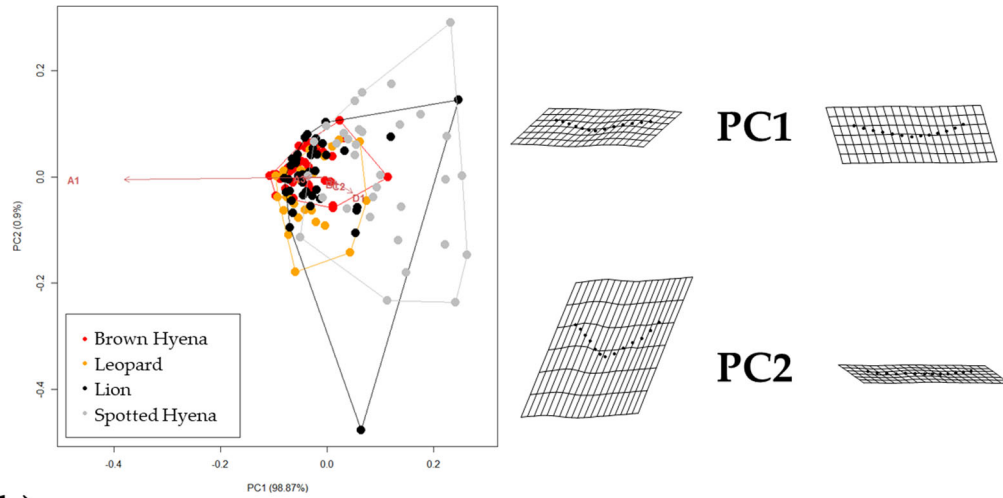

(b)

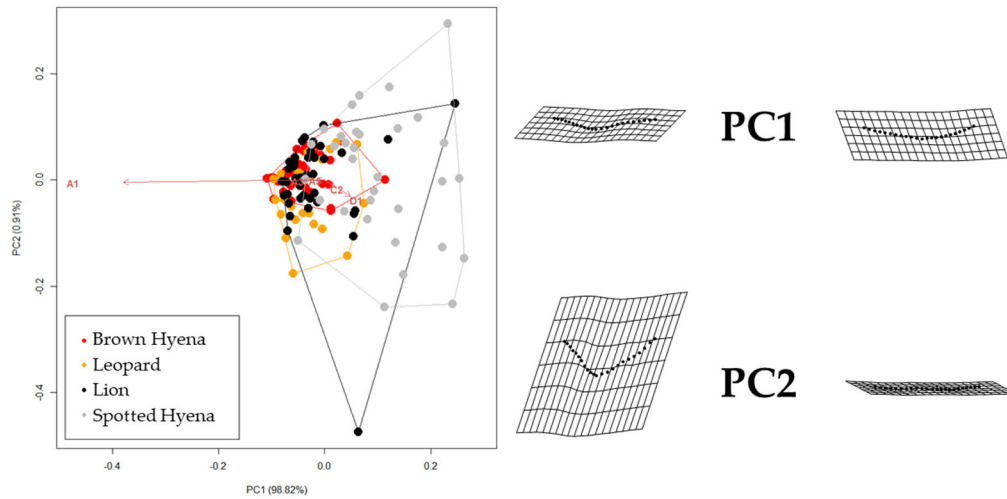

(c)

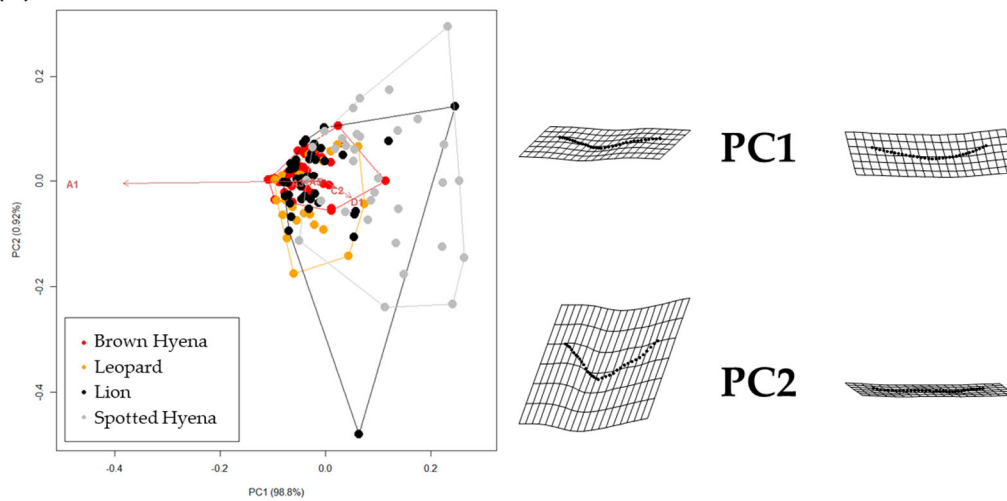

**Figure S9.** Form PCA plots on Elliptic Fourier Analysis on the 2-curves semilandmark models at 50% cross-sectional score length, using (a) 13 points; (b) 23 points; and (c) 33 points. Extreme changes in form along PC1 and PC2 are illustrated with the aid of transformation grids. Optimal harmonics for each model are (a) 4; (b) 6; (c) 6.

**Table S1.** MANOVA results obtained on the 13, 23 and 33 semilandmark models on two curves used to describe the cross-sections at 50% of the score length, using a EFA approach

| semilandmark models on 2 curves at 50% cross-sectional length - EFA |         |         |       |         |         |       |         |         |       |
|---------------------------------------------------------------------|---------|---------|-------|---------|---------|-------|---------|---------|-------|
| 13smlm                                                              |         |         |       | 23smlm  |         |       | 33smlm  |         |       |
| shape                                                               |         |         |       |         |         |       |         |         |       |
|                                                                     | B_Hyena | Leopard | Lion  | B_Hyena | Leopard | Lion  | B_Hyena | Leopard | Lion  |
| Leopard                                                             | 0.002   | -       | -     | 0.003   | -       | -     | 0.001   | -       | -     |
| Lion                                                                | 0.007   | 0.025   | -     | 0.002   | 0.016   | -     | 0.005   | 0.020   | -     |
| S_Hyena                                                             | 0.010   | 0.049   | 0.103 | 0.009   | 0.082   | 0.095 | 0.009   | 0.097   | 0.100 |
| form                                                                |         |         |       |         |         |       |         |         |       |
| Leopard                                                             | 0.008   | -       | -     | 0.006   | -       | -     | 0.005   | -       | -     |
| Lion                                                                | 0.061   | 0.303   | -     | 0.002   | 0.212   | -     | 0.003   | 0.202   | -     |
| S_Hyena                                                             | 0.001   | 0.001   | 0.001 | 0.001   | 0.001   | 0.001 | 0.001   | 0.001   | 0.001 |

**Table S2.** Statistics by class for the best performing ML and NN models applied on the landmark and semilandmark models generated for the present study.

| Models               | Brown hyena | Leopard | Lion   | Spotted hyena |
|----------------------|-------------|---------|--------|---------------|
| GBM                  |             |         |        |               |
| 7 lm at 35% - shape  |             |         |        |               |
| Sensitivity          | 0.6364      | 0.8571  | 0.8182 | 0.8889        |
| Specificity          | 0.8519      | 0.9677  | 0.9259 | 0.9655        |
| Pos Pred Value       | 0.6364      | 0.8571  | 0.8182 | 0.8889        |
| Neg Pred Value       | 0.8519      | 0.9677  | 0.9259 | 0.9655        |
| Prevalence           | 0.2895      | 0.1842  | 0.2895 | 0.2368        |
| Detection rate       | 0.1842      | 0.1579  | 0.2368 | 0.2105        |
| Detection Prevalence | 0.2895      | 0.1842  | 0.2895 | 0.2368        |
| Balanced Accuracy    | 0.7441      | 0.9124  | 0.8721 | 0.9272        |
| GBM                  |             |         |        |               |
| 7 lm at 35% - form   |             |         |        |               |
| Sensitivity          | 0.7273      | 0.28571 | 0.8182 | 0.6667        |
| Specificity          | 0.8519      | 0.93548 | 0.8148 | 0.9310        |
| Pos Pred Value       | 0.6667      | 0.50000 | 0.6429 | 0.7500        |
| Neg Pred Value       | 0.8846      | 0.85294 | 0.9167 | 0.9000        |
| Prevalence           | 0.2895      | 0.18421 | 0.2895 | 0.2368        |
| Detection rate       | 0.2105      | 0.05263 | 0.2368 | 0.1579        |
| Detection Prevalence | 0.3158      | 0.10526 | 0.3684 | 0.2105        |
| Balanced Accuracy    | 0.7896      | 0.61060 | 0.8165 | 0.7989        |
| NN                   |             |         |        |               |
| 7 lm at 50% - shape  |             |         |        |               |
| Sensitivity          | 0.3571      | 0.5714  | 0.5833 | 0.6667        |
| Specificity          | 0.7600      | 0.9688  | 0.7407 | 0.8485        |
| Pos Pred Value       | 0.4545      | 0.8000  | 0.5000 | 0.4444        |
| Neg Pred Value       | 0.6786      | 0.9118  | 0.8000 | 0.9333        |
| Prevalence           | 0.3590      | 0.1795  | 0.3077 | 0.1538        |
| Detection rate       | 0.1282      | 0.1026  | 0.1795 | 0.1026        |
| Detection Prevalence | 0.2821      | 0.1282  | 0.3590 | 0.2308        |
| Balanced Accuracy    | 0.5586      | 0.7701  | 0.6620 | 0.7576        |
| GBM                  |             |         |        |               |
| 7 lm at 50% - form   |             |         |        |               |
| Sensitivity          | 0.7273      | 0.28571 | 0.5455 | 0.7778        |
| Specificity          | 0.7407      | 0.93548 | 0.9259 | 0.8621        |
| Pos Pred Value       | 0.5333      | 0.50000 | 0.7500 | 0.6364        |
| Neg Pred Value       | 0.8696      | 0.85294 | 0.8333 | 0.9259        |
| Prevalence           | 0.2895      | 0.18421 | 0.2895 | 0.2368        |

|                                     |        |         |        |         |
|-------------------------------------|--------|---------|--------|---------|
| Detection rate                      | 0.2105 | 0.05263 | 0.1579 | 0.1842  |
| Detection Prevalence                | 0.3947 | 0.10526 | 0.2105 | 0.2895  |
| Balanced Accuracy                   | 0.7340 | 0.61060 | 0.7357 | 0.8199  |
| <b>GBM 7 lm at 65% - shape</b>      |        |         |        |         |
| Sensitivity                         | 0.3571 | 0.5714  | 0.8333 | 0.6667  |
| Specificity                         | 0.9200 | 0.9688  | 0.8519 | 0.7273  |
| Pos Pred Value                      | 0.7143 | 0.8000  | 0.7143 | 0.3077  |
| Neg Pred Value                      | 0.7188 | 0.9118  | 0.9200 | 0.9231  |
| Prevalence                          | 0.3590 | 0.1795  | 0.3077 | 0.1538  |
| Detection rate                      | 0.1282 | 0.1026  | 0.2564 | 0.1026  |
| Detection Prevalence                | 0.1795 | 0.1282  | 0.3590 | 0.3333  |
| Balanced Accuracy                   | 0.6386 | 0.7701  | 0.8426 | 0.6970  |
| <b>RF 7 lm at 65% - form</b>        |        |         |        |         |
| Sensitivity                         | 0.8571 | 0.42857 | 0.5000 | 1.0000  |
| Specificity                         | 0.8000 | 0.96875 | 0.8889 | 0.9091  |
| Pos Pred Value                      | 0.7059 | 0.75000 | 0.6667 | 0.6667  |
| Neg Pred Value                      | 0.9091 | 0.88571 | 0.8000 | 1.0000  |
| Prevalence                          | 0.3590 | 0.17949 | 0.3077 | 0.1538  |
| Detection rate                      | 0.3077 | 0.07692 | 0.1538 | 0.1538  |
| Detection Prevalence                | 0.4359 | 0.10256 | 0.2308 | 0.2308  |
| Balanced Accuracy                   | 0.8286 | 0.69866 | 0.6944 | 0.9545  |
| <b>GBM 7 lm at U section - form</b> |        |         |        |         |
| Sensitivity                         | 0.6923 | 0.28571 | 0.5000 | 0.6667  |
| Specificity                         | 0.7857 | 0.76471 | 0.9310 | 0.9375  |
| Pos Pred Value                      | 0.6000 | 0.20000 | 0.7500 | 0.7500  |
| Neg Pred Value                      | 0.8462 | 0.83871 | 0.8182 | 0.9091  |
| Prevalence                          | 0.3171 | 0.17073 | 0.2927 | 0.2195  |
| Detection rate                      | 0.2195 | 0.04878 | 0.1463 | 0.1463  |
| Detection Prevalence                | 0.3659 | 0.24390 | 0.1951 | 0.1951  |
| Balanced Accuracy                   | 0.7390 | 0.52521 | 0.7155 | 0.8021  |
| <b>GBM 10 smlm at 50% - shape</b>   |        |         |        |         |
| Sensitivity                         | 0.8182 | 0.28571 | 0.5455 | 0.22222 |
| Specificity                         | 0.7407 | 1.00000 | 0.7037 | 0.86207 |
| Pos Pred Value                      | 0.5625 | 1.00000 | 0.4286 | 0.33333 |
| Neg Pred Value                      | 0.9091 | 0.86111 | 0.7917 | 0.78125 |
| Prevalence                          | 0.2895 | 0.18421 | 0.2895 | 0.23684 |
| Detection rate                      | 0.2368 | 0.05263 | 0.1579 | 0.05263 |
| Detection Prevalence                | 0.4211 | 0.05263 | 0.3684 | 0.15789 |
| Balanced Accuracy                   | 0.7795 | 0.64286 | 0.6246 | 0.54215 |
| <b>RF 10 smlm at 50% - form</b>     |        |         |        |         |
| Sensitivity                         | 0.5000 | 0.14286 | 0.7500 | 0.8333  |
| Specificity                         | 0.7600 | 0.90625 | 0.8148 | 0.9091  |
| Pos Pred Value                      | 0.5385 | 0.25000 | 0.6429 | 0.6250  |
| Neg Pred Value                      | 0.7308 | 0.82857 | 0.8800 | 0.9677  |
| Prevalence                          | 0.3590 | 0.17949 | 0.3077 | 0.1538  |
| Detection rate                      | 0.1795 | 0.02564 | 0.2308 | 0.1282  |
| Detection Prevalence                | 0.3333 | 0.10256 | 0.3590 | 0.2051  |
| Balanced Accuracy                   | 0.6300 | 0.52455 | 0.7824 | 0.8712  |
| <b>RF 25 smlm at 50% - form</b>     |        |         |        |         |
| Sensitivity                         | 0.5714 | 0.28571 | 0.8333 | 0.8333  |
| Specificity                         | 0.8000 | 0.90625 | 0.8519 | 0.9394  |
| Pos Pred Value                      | 0.6154 | 0.40000 | 0.7143 | 0.7143  |
| Neg Pred Value                      | 0.7692 | 0.85294 | 0.9200 | 0.9688  |
| Prevalence                          | 0.3590 | 0.17949 | 0.3077 | 0.1538  |
| Detection rate                      | 0.2051 | 0.05128 | 0.2564 | 0.1282  |
| Detection Prevalence                | 0.3333 | 0.12821 | 0.3590 | 0.1795  |
| Balanced Accuracy                   | 0.6857 | 0.59598 | 0.8426 | 0.8864  |
| <b>GBM 50 smlm at 50% - form</b>    |        |         |        |         |
| Sensitivity                         | 0.5000 | 0.7143  | 0.7500 | 0.6667  |

|                                     |        |         |        |         |
|-------------------------------------|--------|---------|--------|---------|
| Specificity                         | 0.8800 | 0.8750  | 0.8148 | 0.9394  |
| Pos Pred Value                      | 0.7000 | 0.5556  | 0.6429 | 0.6667  |
| Neg Pred Value                      | 0.7586 | 0.9333  | 0.8800 | 0.9394  |
| Prevalence                          | 0.3590 | 0.1795  | 0.3077 | 0.1538  |
| Detection rate                      | 0.1795 | 0.1282  | 0.2308 | 0.1026  |
| Detection Prevalence                | 0.2564 | 0.2308  | 0.3590 | 0.1538  |
| Balanced Accuracy                   | 0.6900 | 0.7946  | 0.7824 | 0.8030  |
| <b>GBM</b>                          |        |         |        |         |
| <b>13 smlm at U section - form</b>  |        |         |        |         |
| Sensitivity                         | 0.8000 | 0.11111 | 0.5556 | 1.0000  |
| Specificity                         | 0.6875 | 1.00000 | 0.8750 | 0.8649  |
| Pos Pred Value                      | 0.4444 | 1.00000 | 0.7692 | 0.5000  |
| Neg Pred Value                      | 0.9167 | 0.80488 | 0.7241 | 1.0000  |
| Prevalence                          | 0.2381 | 0.21429 | 0.4286 | 0.1190  |
| Detection rate                      | 0.1905 | 0.02381 | 0.2381 | 0.1190  |
| Detection Prevalence                | 0.4286 | 0.02381 | 0.3095 | 0.2381  |
| Balanced Accuracy                   | 0.7438 | 0.55556 | 0.7153 | 0.9324  |
| <b>NN</b>                           |        |         |        |         |
| <b>23 smlm at U section - shape</b> |        |         |        |         |
| Sensitivity                         | 0.8000 | 0.5556  | 0.4444 | 0.20000 |
| Specificity                         | 0.5938 | 0.9697  | 0.9583 | 0.86486 |
| Pos Pred Value                      | 0.3810 | 0.8333  | 0.8889 | 0.16667 |
| Neg Pred Value                      | 0.9048 | 0.8889  | 0.6970 | 0.88889 |
| Prevalence                          | 0.2381 | 0.2143  | 0.4286 | 0.11905 |
| Detection rate                      | 0.1905 | 0.1190  | 0.1905 | 0.02381 |
| Detection Prevalence                | 0.5000 | 0.1429  | 0.2143 | 0.14286 |
| Balanced Accuracy                   | 0.6969 | 0.7626  | 0.7014 | 0.53243 |
| <b>SVM</b>                          |        |         |        |         |
| <b>23 smlm at U section- form</b>   |        |         |        |         |
| Sensitivity                         | 0.7143 | 0.40000 | 0.5385 | 0.6250  |
| Specificity                         | 0.6774 | 0.94286 | 0.9062 | 0.8919  |
| Pos Pred Value                      | 0.5000 | 0.66667 | 0.7000 | 0.5556  |
| Neg Pred Value                      | 0.8400 | 0.84615 | 0.8286 | 0.9167  |
| Prevalence                          | 0.3111 | 0.22222 | 0.2889 | 0.1778  |
| Detection rate                      | 0.2222 | 0.08889 | 0.1556 | 0.1111  |
| Detection Prevalence                | 0.4444 | 0.13333 | 0.2222 | 0.2000  |
| Balanced Accuracy                   | 0.6959 | 0.67143 | 0.7224 | 0.7584  |
| <b>SVM</b>                          |        |         |        |         |
| <b>33 smlm at U section- form</b>   |        |         |        |         |
| Sensitivity                         | 0.7143 | 0.30000 | 0.4615 | 0.6250  |
| Specificity                         | 0.7097 | 0.91429 | 0.8438 | 0.8919  |
| Pos Pred Value                      | 0.5263 | 0.50000 | 0.5455 | 0.5556  |
| Neg Pred Value                      | 0.8462 | 0.82051 | 0.7941 | 0.9167  |
| Prevalence                          | 0.3111 | 0.22222 | 0.2889 | 0.1778  |
| Detection rate                      | 0.2222 | 0.06667 | 0.1333 | 0.1111  |
| Detection Prevalence                | 0.4222 | 0.13333 | 0.2444 | 0.2000  |
| Balanced Accuracy                   | 0.7120 | 0.60714 | 0.6526 | 0.7584  |
| <b>NN</b>                           |        |         |        |         |
| <b>10 EFA at 50% - form</b>         |        |         |        |         |
| Sensitivity                         | 0.4286 | 0.14286 | 0.6667 | 1.0000  |
| Specificity                         | 0.8000 | 1.00000 | 0.8148 | 0.7576  |
| Pos Pred Value                      | 0.5455 | 1.00000 | 0.6154 | 0.4286  |
| Neg Pred Value                      | 0.7143 | 0.84211 | 0.8462 | 1.0000  |
| Prevalence                          | 0.3590 | 0.17949 | 0.3077 | 0.1538  |
| Detection rate                      | 0.1538 | 0.02564 | 0.2051 | 0.1538  |
| Detection Prevalence                | 0.2821 | 0.02564 | 0.3333 | 0.3590  |
| Balanced Accuracy                   | 0.6143 | 0.57143 | 0.7407 | 0.8788  |
| <b>RF</b>                           |        |         |        |         |
| <b>25 EFA at 50% - form</b>         |        |         |        |         |
| Sensitivity                         | 0.5000 | 0.00000 | 0.6667 | 1.0000  |
| Specificity                         | 0.7600 | 0.93750 | 0.7407 | 0.9091  |
| Pos Pred Value                      | 0.5385 | 0.00000 | 0.5333 | 0.6667  |
| Neg Pred Value                      | 0.7308 | 0.81081 | 0.8333 | 1.0000  |
| Prevalence                          | 0.3590 | 0.17949 | 0.3077 | 0.1538  |
| Detection rate                      | 0.1795 | 0.00000 | 0.2051 | 0.1538  |



|                                  |        |         |        |        |
|----------------------------------|--------|---------|--------|--------|
| Detection Prevalence             | 0.3333 | 0.05128 | 0.3846 | 0.2308 |
| Balanced Accuracy                | 0.6300 | 0.46875 | 0.7037 | 0.9545 |
| <b>NN 50 EFA at 50% - form</b>   |        |         |        |        |
| Sensitivity                      | 0.5000 | 0.14286 | 0.5833 | 1.0000 |
| Specificity                      | 0.7200 | 0.93750 | 0.8148 | 0.8788 |
| Pos Pred Value                   | 0.5000 | 0.33333 | 0.5833 | 0.6000 |
| Neg Pred Value                   | 0.7200 | 0.83333 | 0.8148 | 1.0000 |
| Prevalence                       | 0.3590 | 0.17949 | 0.3077 | 0.1538 |
| Detection rate                   | 0.1795 | 0.02564 | 0.1795 | 0.1538 |
| Detection Prevalence             | 0.3590 | 0.07692 | 0.3077 | 0.2564 |
| Balanced Accuracy                | 0.6100 | 0.54018 | 0.6991 | 0.9394 |
| <b>GBM 13 EFA at 50% - shape</b> |        |         |        |        |
| Sensitivity                      | 0.5714 | 0.00000 | 0.6667 | 0.6667 |
| Specificity                      | 0.6800 | 0.96875 | 0.8148 | 0.8485 |
| Pos Pred Value                   | 0.5000 | 0.00000 | 0.6154 | 0.4444 |
| Neg Pred Value                   | 0.7391 | 0.81579 | 0.8462 | 0.9333 |
| Prevalence                       | 0.3590 | 0.17949 | 0.3077 | 0.1538 |
| Detection rate                   | 0.2051 | 0.00000 | 0.2051 | 0.1026 |
| Detection Prevalence             | 0.4103 | 0.02564 | 0.3333 | 0.2308 |
| Balanced Accuracy                | 0.6257 | 0.48438 | 0.7407 | 0.7576 |
| <b>RF 13 EFA at 50% - form</b>   |        |         |        |        |
| Sensitivity                      | 0.7857 | 0.00000 | 0.5833 | 0.8333 |
| Specificity                      | 0.7200 | 0.96875 | 0.8519 | 0.8788 |
| Pos Pred Value                   | 0.6111 | 0.00000 | 0.6364 | 0.5556 |
| Neg Pred Value                   | 0.8571 | 0.81579 | 0.8214 | 0.9667 |
| Prevalence                       | 0.3590 | 0.17949 | 0.3077 | 0.1538 |
| Detection rate                   | 0.2821 | 0.00000 | 0.1795 | 0.1282 |
| Detection Prevalence             | 0.4615 | 0.02564 | 0.2821 | 0.2308 |
| Balanced Accuracy                | 0.7529 | 0.48438 | 0.7176 | 0.8561 |
| <b>GBM 23 EFA at 50% - shape</b> |        |         |        |        |
| Sensitivity                      | 0.5714 | 0.00000 | 0.6667 | 0.6667 |
| Specificity                      | 0.6800 | 0.96875 | 0.8148 | 0.8485 |
| Pos Pred Value                   | 0.5000 | 0.00000 | 0.6154 | 0.4444 |
| Neg Pred Value                   | 0.7391 | 0.81579 | 0.8462 | 0.9333 |
| Prevalence                       | 0.3590 | 0.17949 | 0.3077 | 0.1538 |
| Detection rate                   | 0.2051 | 0.00000 | 0.2051 | 0.1026 |
| Detection Prevalence             | 0.4103 | 0.02564 | 0.3333 | 0.2308 |
| Balanced Accuracy                | 0.6257 | 0.48438 | 0.7407 | 0.7576 |
| <b>RF 23 EFA at 50%</b>          |        |         |        |        |
| Sensitivity                      | 0.7857 | 0.00000 | 0.5833 | 0.8333 |
| Specificity                      | 0.7200 | 0.96875 | 0.8519 | 0.8788 |
| Pos Pred Value                   | 0.6111 | 0.00000 | 0.6364 | 0.5556 |
| Neg Pred Value                   | 0.8571 | 0.81579 | 0.8214 | 0.9667 |
| Prevalence                       | 0.3590 | 0.17949 | 0.3077 | 0.1538 |
| Detection rate                   | 0.2821 | 0.00000 | 0.1795 | 0.1282 |
| Detection Prevalence             | 0.4615 | 0.02564 | 0.2821 | 0.2308 |
| Balanced Accuracy                | 0.7529 | 0.48438 | 0.7176 | 0.8561 |
| <b>GBM 33 EFA at 50% - shape</b> |        |         |        |        |
| Sensitivity                      | 0.8182 | 0.14286 | 0.5455 | 0.4444 |
| Specificity                      | 0.7407 | 0.93548 | 0.8519 | 0.8276 |
| Pos Pred Value                   | 0.5625 | 0.33333 | 0.6000 | 0.4444 |
| Neg Pred Value                   | 0.9091 | 0.82857 | 0.8214 | 0.8276 |
| Prevalence                       | 0.2895 | 0.18421 | 0.2895 | 0.2368 |
| Detection rate                   | 0.2368 | 0.02632 | 0.1579 | 0.1053 |
| Detection Prevalence             | 0.4211 | 0.07895 | 0.2632 | 0.2368 |
| Balanced Accuracy                | 0.7795 | 0.53917 | 0.6987 | 0.6360 |
| <b>GBM 33 EFA at 50% - form</b>  |        |         |        |        |
| Sensitivity                      | 0.7857 | 0.00000 | 0.6667 | 1.0000 |
| Specificity                      | 0.7600 | 0.96875 | 0.9259 | 0.8485 |

|                                   |        |         |        |         |
|-----------------------------------|--------|---------|--------|---------|
| Pos Pred Value                    | 0.6471 | 0.00000 | 0.8000 | 0.5455  |
| Neg Pred Value                    | 0.8636 | 0.81579 | 0.8621 | 1.0000  |
| Prevalence                        | 0.3590 | 0.17949 | 0.3077 | 0.1538  |
| Detection rate                    | 0.2821 | 0.00000 | 0.2051 | 0.1538  |
| Detection Prevalence              | 0.4359 | 0.02564 | 0.2564 | 0.2821  |
| Balanced Accuracy                 | 0.7729 | 0.48438 | 0.7963 | 0.9242  |
| <b>GBM</b>                        |        |         |        |         |
| <b>13 EFA at U section - form</b> |        |         |        |         |
| Sensitivity                       | 0.6923 | 0.14286 | 0.5000 | 0.7778  |
| Specificity                       | 0.7143 | 0.91176 | 0.8966 | 0.8750  |
| Pos Pred Value                    | 0.5294 | 0.25000 | 0.6667 | 0.6364  |
| Neg Pred Value                    | 0.8333 | 0.83784 | 0.8125 | 0.9333  |
| Prevalence                        | 0.3171 | 0.17073 | 0.2927 | 0.2195  |
| Detection rate                    | 0.2195 | 0.02439 | 0.1463 | 0.1707  |
| Detection Prevalence              | 0.4146 | 0.09756 | 0.2195 | 0.2683  |
| Balanced Accuracy                 | 0.7033 | 0.52731 | 0.6983 | 0.8264  |
| <b>NN</b>                         |        |         |        |         |
| <b>23 EFA at U section - form</b> |        |         |        |         |
| Sensitivity                       | 0.6000 | 0.33333 | 0.5000 | 0.60000 |
| Specificity                       | 0.5938 | 0.96970 | 0.9167 | 0.86486 |
| Pos Pred Value                    | 0.3158 | 0.75000 | 0.8182 | 0.37500 |
| Neg Pred Value                    | 0.8261 | 0.84211 | 0.7097 | 0.94118 |
| Prevalence                        | 0.2381 | 0.21429 | 0.4286 | 0.11905 |
| Detection rate                    | 0.1429 | 0.07143 | 0.2143 | 0.07143 |
| Detection Prevalence              | 0.4524 | 0.09524 | 0.2619 | 0.19048 |
| Balanced Accuracy                 | 0.5969 | 0.65152 | 0.7083 | 0.73243 |
| <b>SVM</b>                        |        |         |        |         |
| <b>33 EFA at U section - form</b> |        |         |        |         |
| Sensitivity                       | 0.6154 | 0.28571 | 0.5833 | 0.44444 |
| Specificity                       | 0.6429 | 0.88235 | 0.9310 | 0.87500 |
| Pos Pred Value                    | 0.4444 | 0.33333 | 0.7778 | 0.50000 |
| Neg Pred Value                    | 0.7826 | 0.85714 | 0.8438 | 0.84848 |
| Prevalence                        | 0.3171 | 0.17073 | 0.2927 | 0.21951 |
| Detection rate                    | 0.1951 | 0.04878 | 0.1707 | 0.09756 |
| Detection Prevalence              | 0.4390 | 0.14634 | 0.2195 | 0.19512 |
| Balanced Accuracy                 | 0.6291 | 0.58403 | 0.7572 | 0.65972 |
